# Supplementary material for: Deciphering Alterations of Rodent Bones through In Vitro Digestion: An Avenue to Understand Pre-Diagenetic Agents?
Source: MDPI journal article supplement (doi:10.3390/min13010124), 2023-01-14
Supplement: s1 [file s1]

## Supporting Information

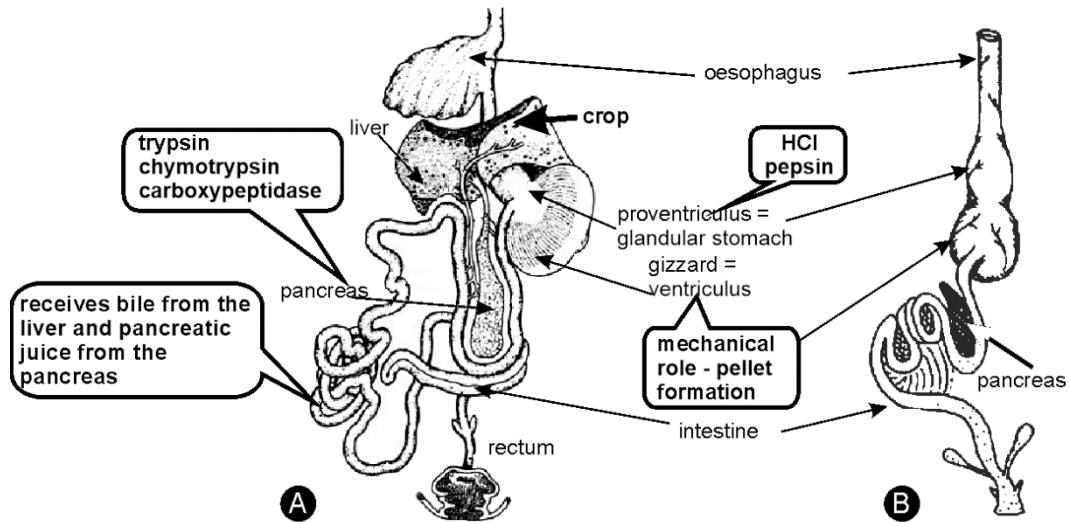

**Figure S1.** Two types of digestive tracts, enzymes involved and action of the different components. (A) Pigeon (redrawn from <https://www.notesonzoology.com/pigeon/digestive-system-of-pigeon-with-diagram-zoology/3775>), (B) Bird of preys (Redrawn from [3]). *Tyto alba* and *Bubo bubo* (birds of preys) have no crop, and their intestinal tract is shorter than those of chicken or pigeon.

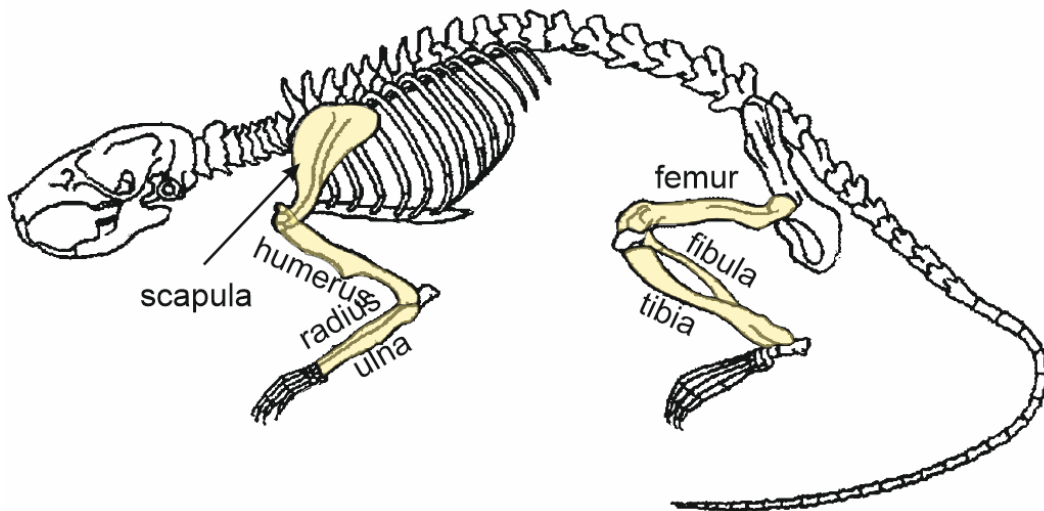

**Figure S2.** Rodent skeleton in lateral view. In yellow: bones submitted to experimental acidic and enzymatic digestions.

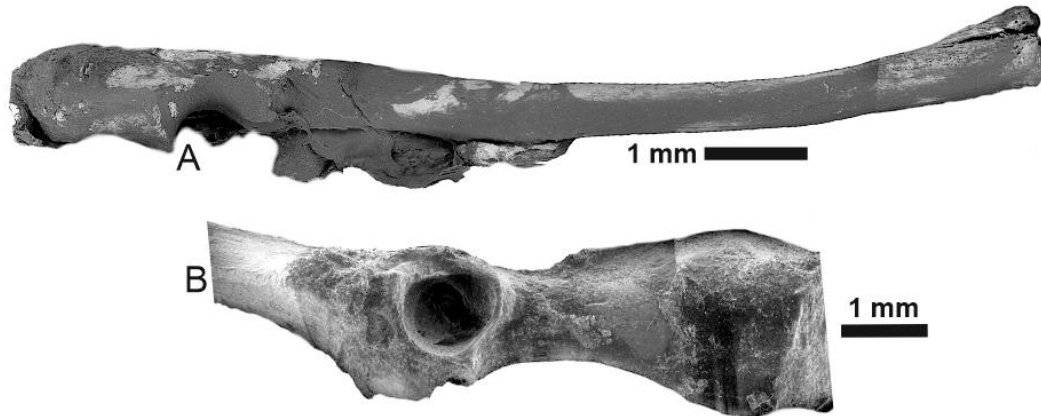

**Figure S3.** External aspect of two unetched bones of *Mus musculus*, showing the residual soft tissues after to be manually defleshed. . (A) Ulna, (B) Pelvis

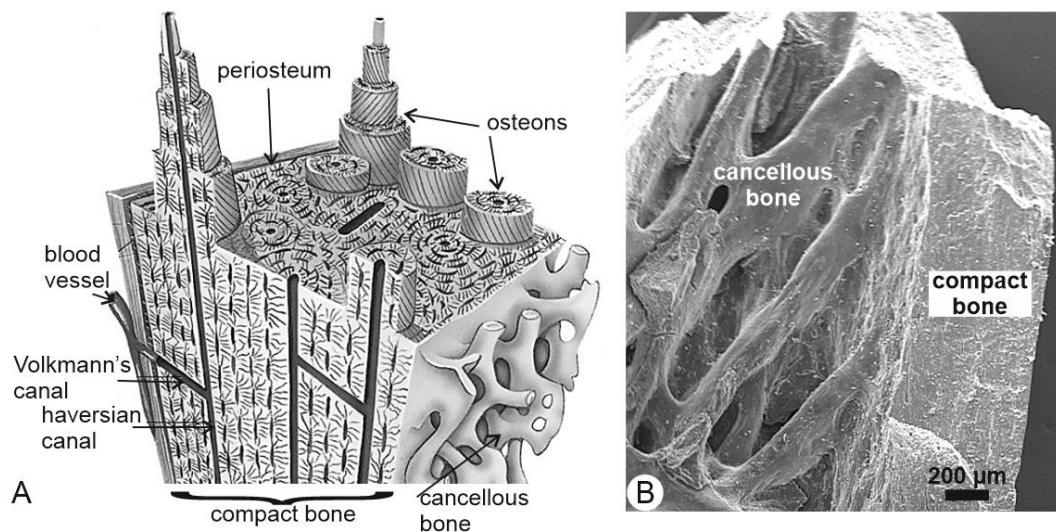

**Figure S4.** A. Schematic inner structure of a long bone showing the compact and cancellous structures; modified from a pdf file from Dr A. Albtosh (Department of Anatomy Histology and Embryology, college of Medicine, Karak City, Jordan). B. Fracture of a long bone from *Rattus* showing both structures.

**Table S1.** Categories of predators and induced damages adapted from [8,21].

| categories | predators                                                         | examples                                                                      | damages                                                                                                                                                                              |
|------------|-------------------------------------------------------------------|-------------------------------------------------------------------------------|--------------------------------------------------------------------------------------------------------------------------------------------------------------------------------------|
| 1          | barn owl, snowy owl<br>great grey owl                             | <i>Tyto alba</i> , <i>Nyctea scandiaca</i><br><i>Strix nebulosa</i>           | very little modifications<br>absent or light digestion                                                                                                                               |
| 2          | long-eared owl<br>african eagle owl                               | <i>Asio otus</i> , <i>Bubo lacteus</i> ,<br><i>Bubo africanus</i>             | little modification, light degree of digestion<br>though enamel is removed from incisor tips                                                                                         |
| 3          | tawny owl, european<br>eagle owl                                  | <i>Strix aluco</i> , <i>Bubo bubo</i>                                         | greater destruction, moderate/heavy<br>digestion over the enamel                                                                                                                     |
| 4          | little owl, kestrel and<br>peregrines - viverids<br>and mustelids | <i>Athene noctua</i> ,<br><i>Falco tinnunculus</i><br><i>Falco peregrinus</i> | extreme enamel and dentine corrosion;<br>mustelids: extreme modification but digested<br>elements are in low percentages                                                             |
| 5          | buzzards and kites,<br>canids and felids                          | <i>Buteo buteo</i> , <i>Circus sp.</i> , <i>Milvus<br/>mylvis</i>             | the most destructive effects; mammalian carnivores:<br>rounded edges of skeletal elements.<br>rare gnaw marks, except for some instances of canid<br>predation and of some mustelids |
